# Supplementary material for: Gamma-band auditory steady-state response after frontal tDCS: A double-blind, randomized, crossover study
Source: PubMed Central journal article supplement (PMC5830999; doi:10.1371/journal.pone.0193422), 2018-02-28

# ERSP

bankssts

Left

Right

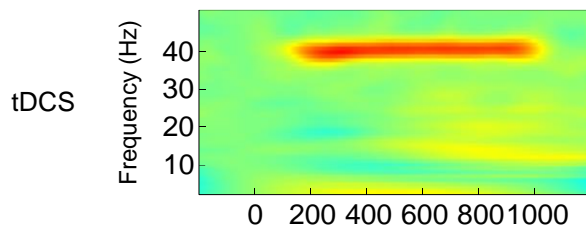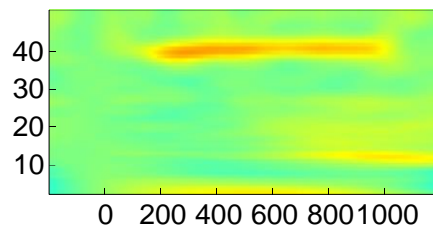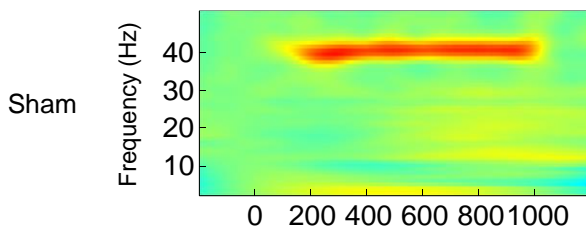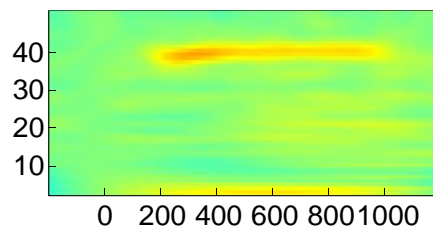

caudalanteriorcingulate

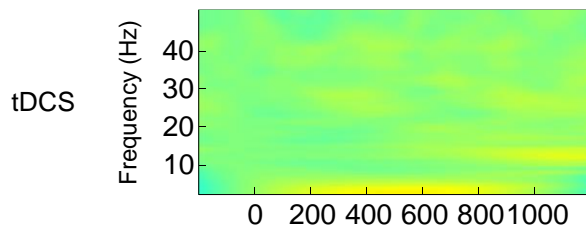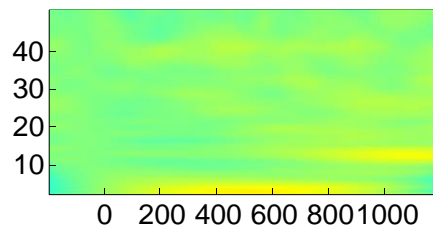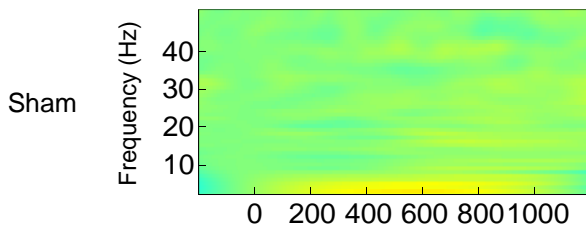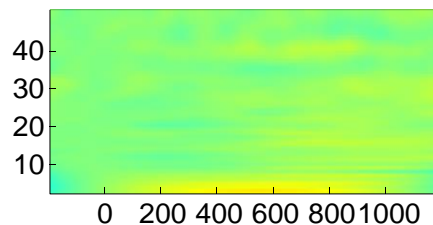

caudalmiddlefrontal

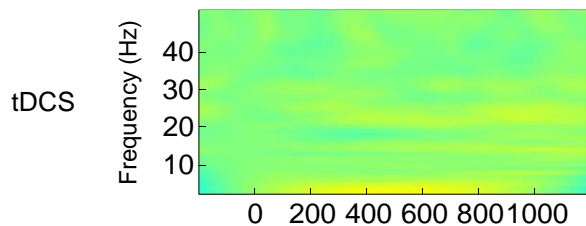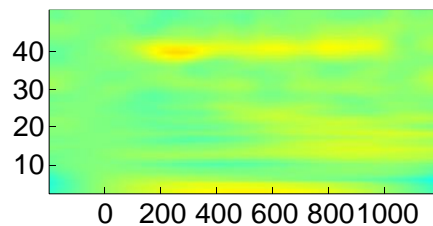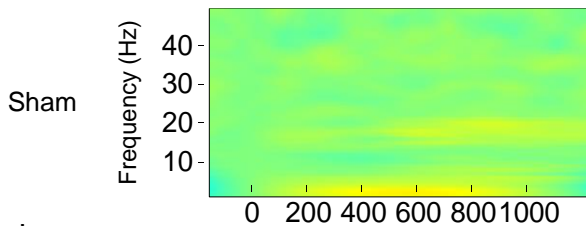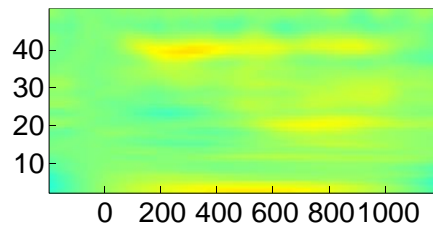

% change

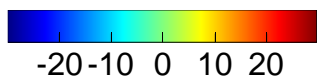

Time (ms)

Time (ms)

cuneus

Left

Right

tDCS

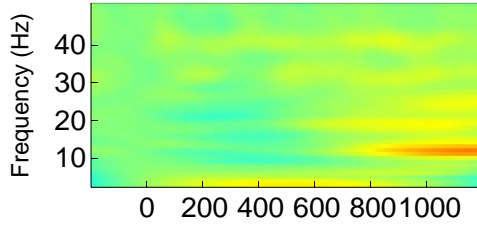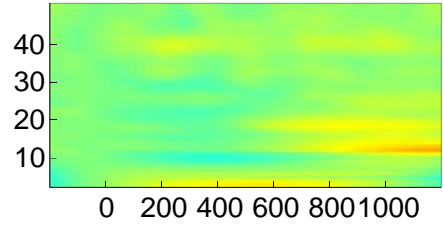

Sham

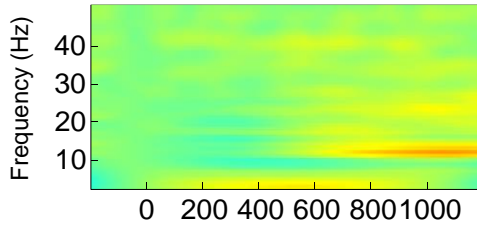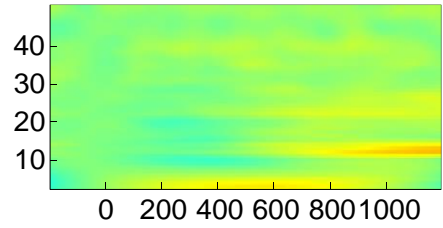

entorhinal

tDCS

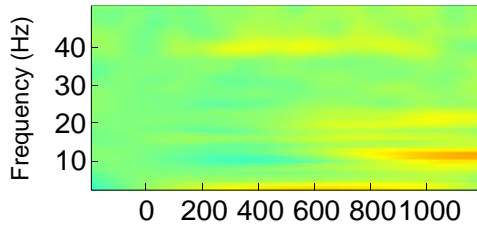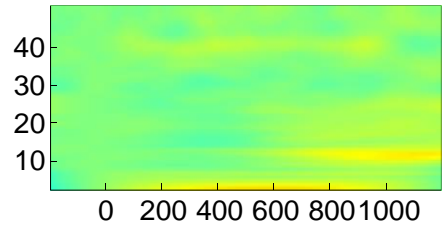

Sham

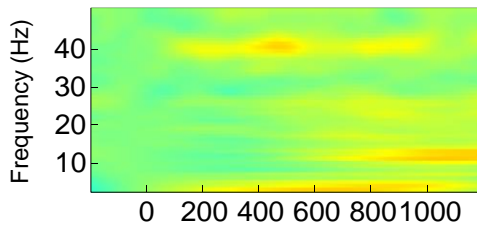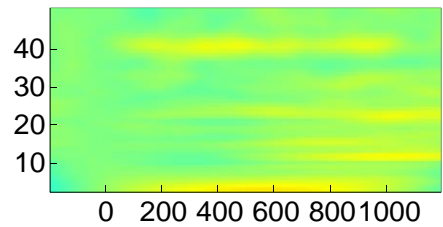

frontalpole

tDCS

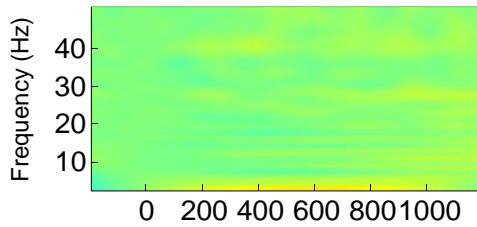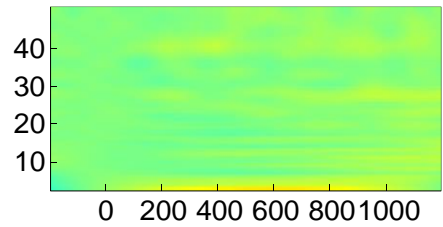

Sham

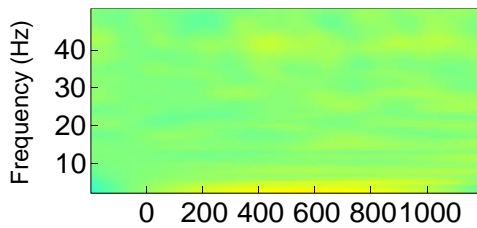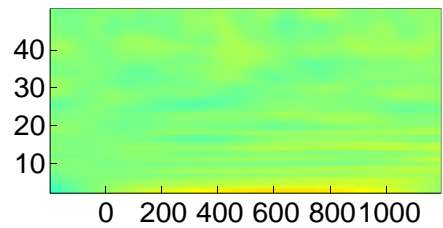

Time (ms)

Time (ms)

fusiform

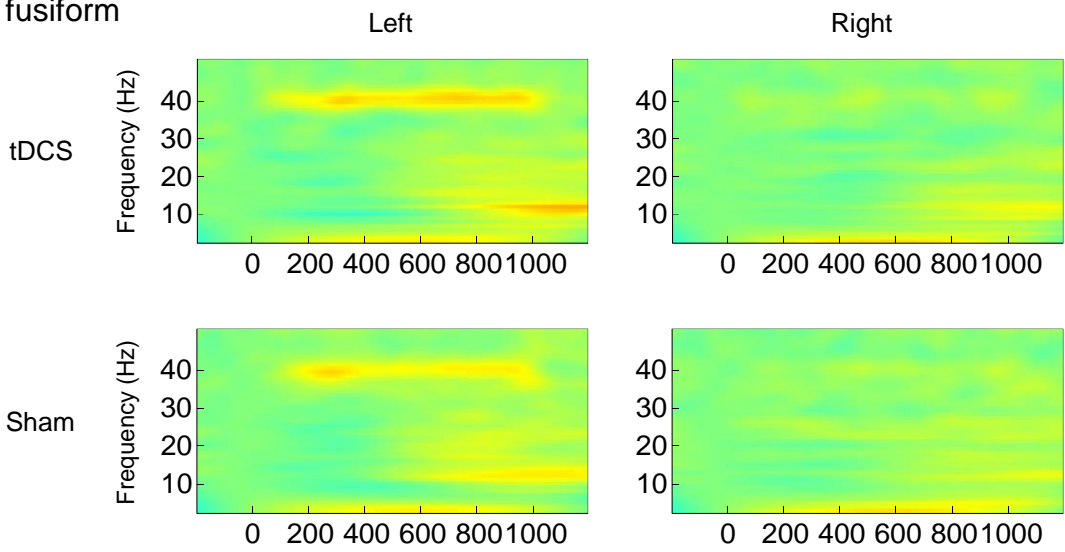

inferiorparietal

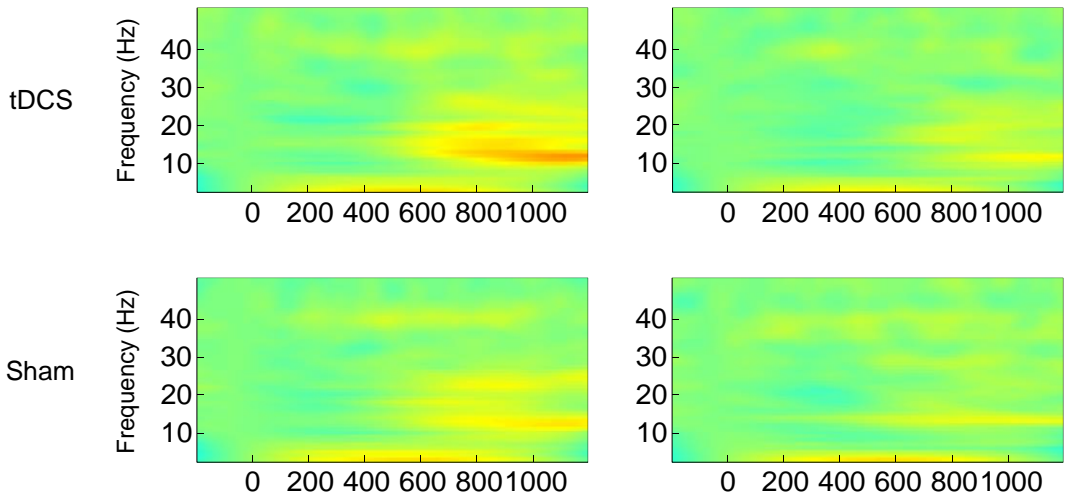

inferiortemporal

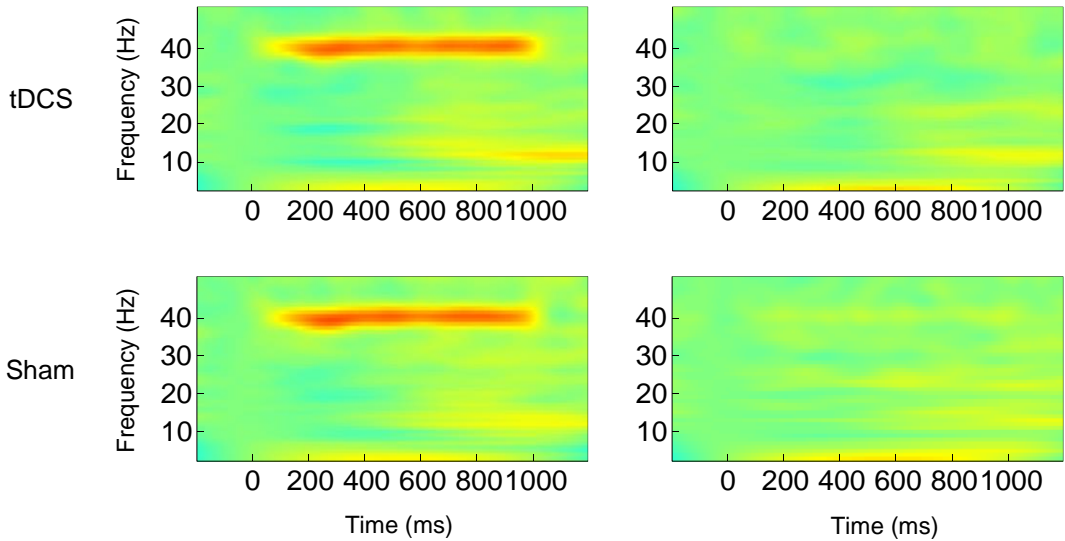

insula

Left

Right

tDCS

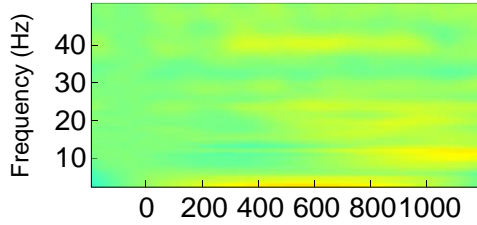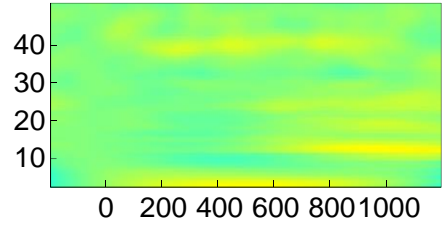

Sham

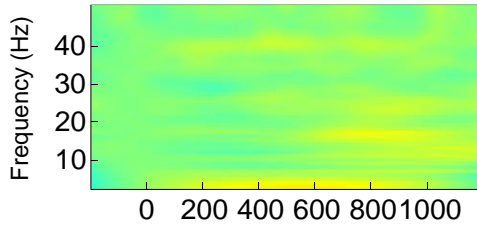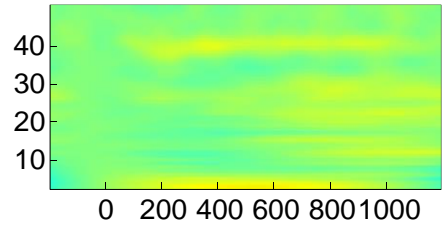

isthmuscingulate

tDCS

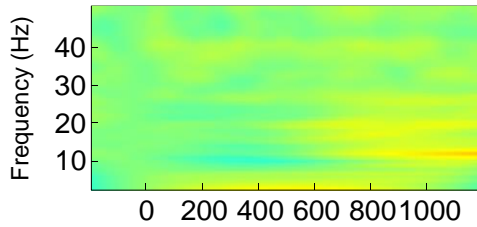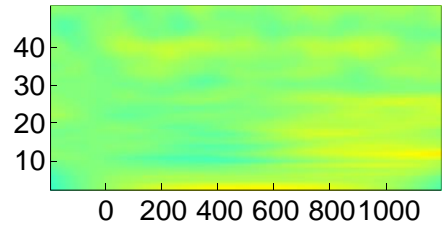

Sham

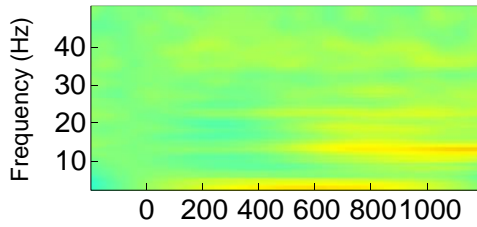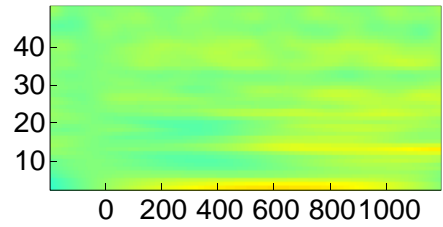

lateraloccipital

tDCS

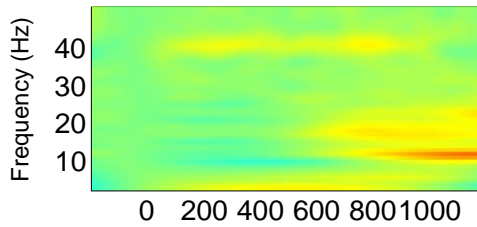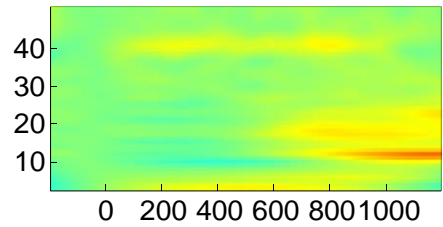

Sham

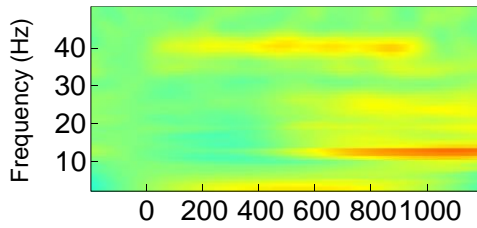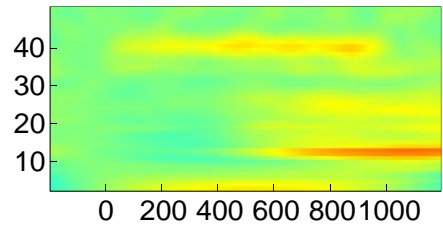

Time (ms)

Time (ms)

lateralorbitofrontal

Left

Right

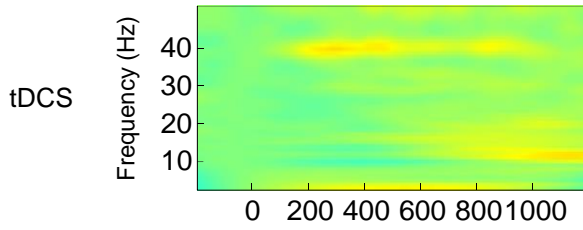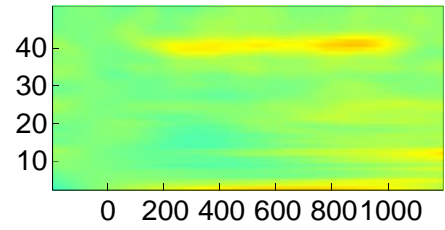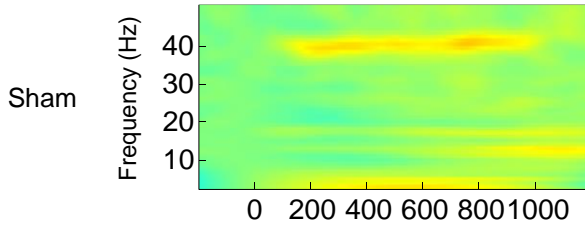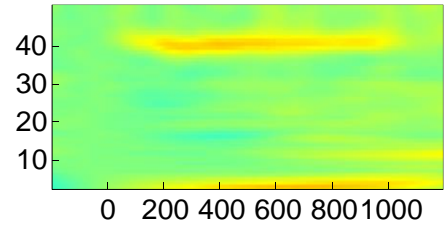

lingual

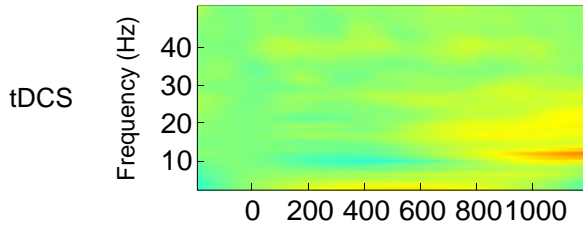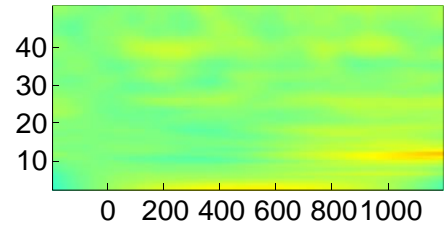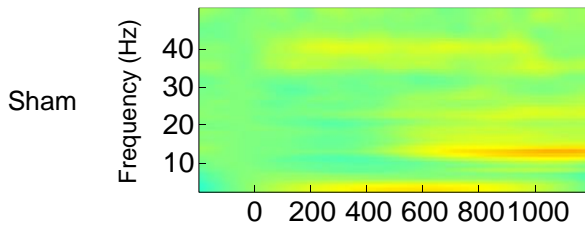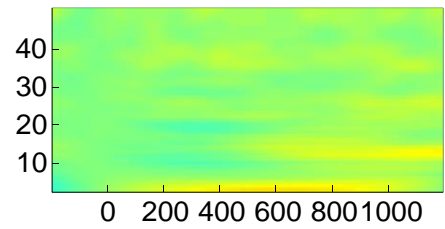

medialorbitofrontal

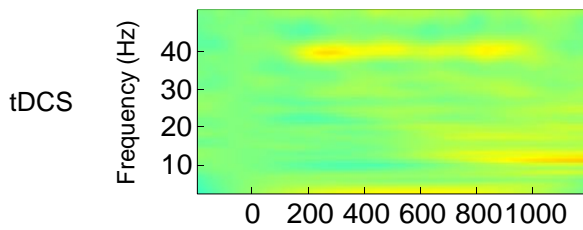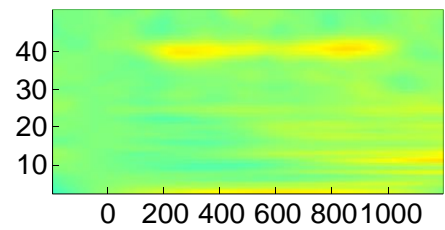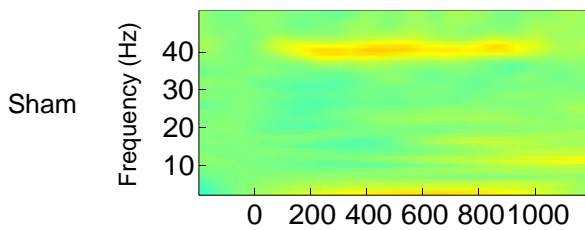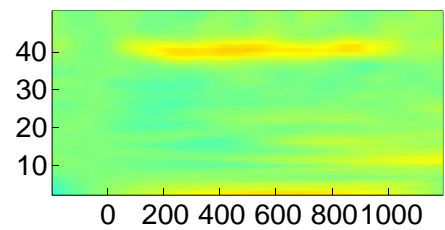

Time (ms)

Time (ms)



middletemporal

Left

Right

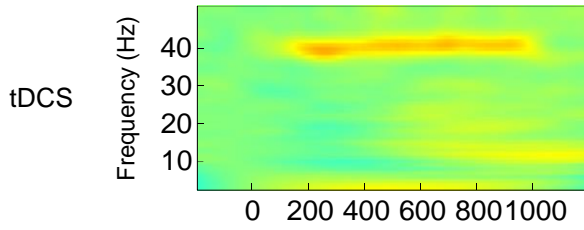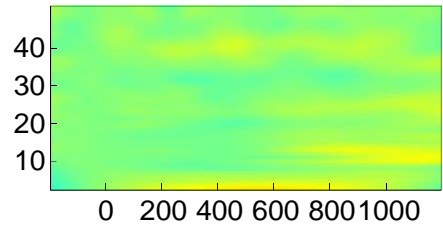

Sham

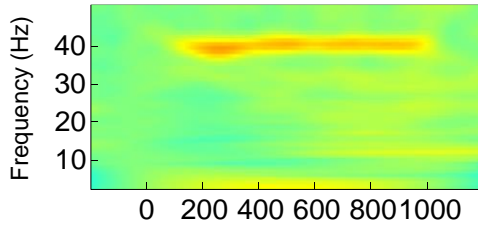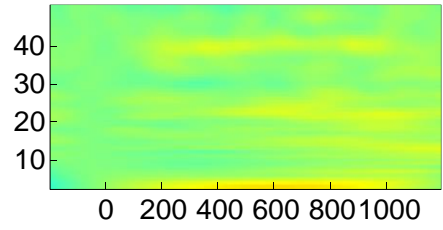

paracentral

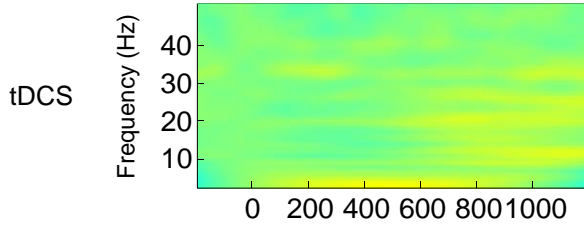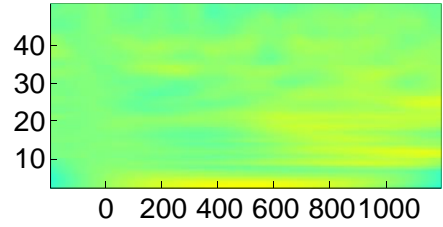

Sham

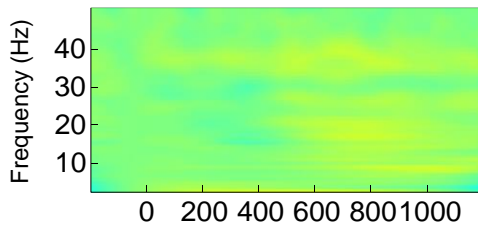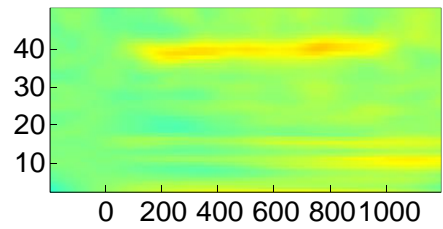

parahippocampal

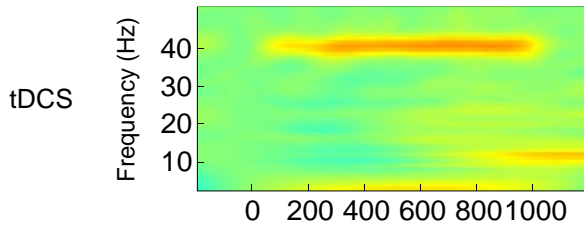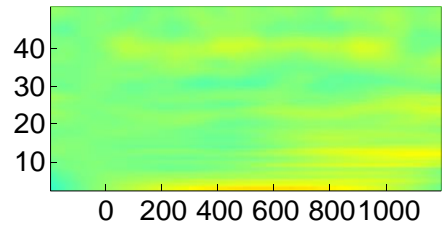

Sham

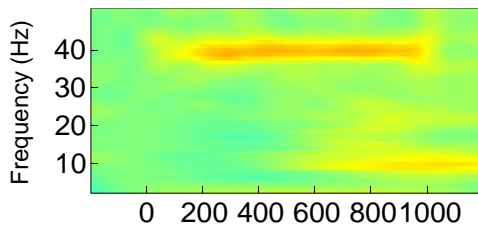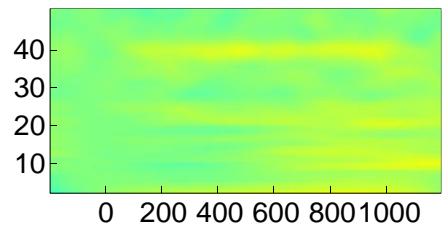

Time (ms)

Time (ms)

parsopercularis

Left

Right

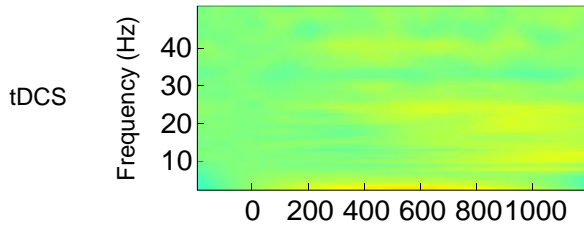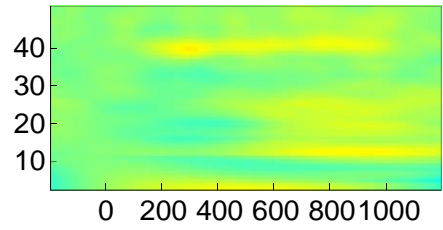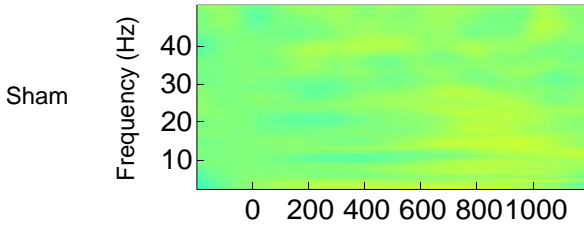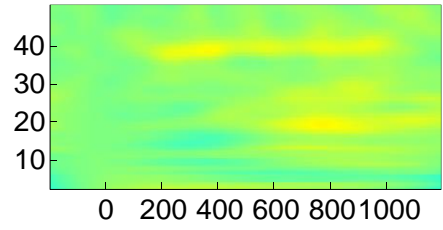

parsorbitalis

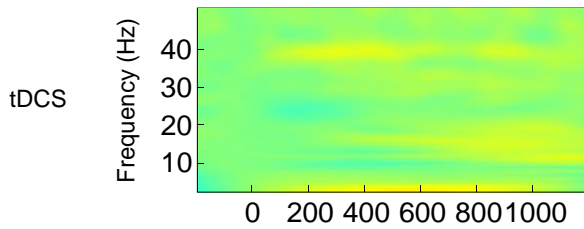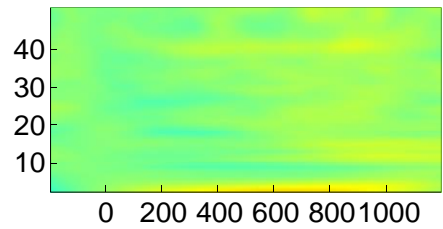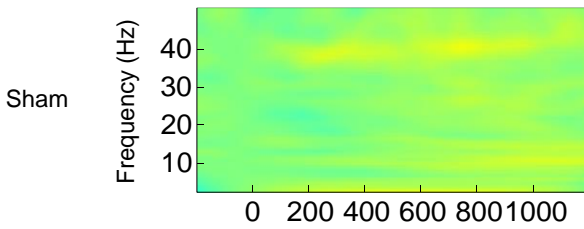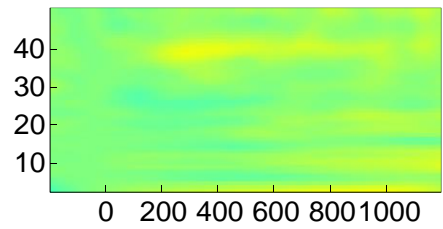

parstriangularis

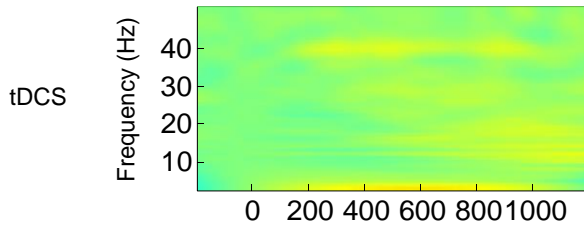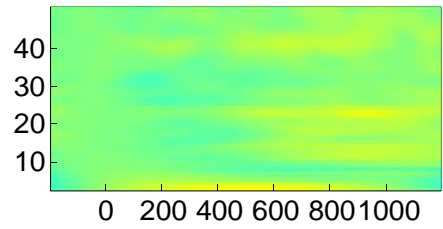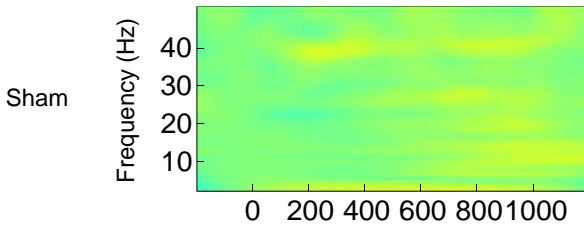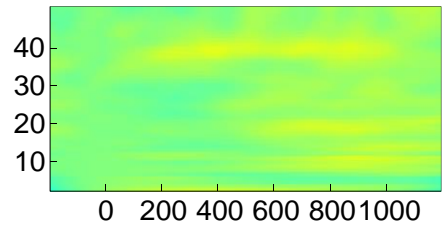

Time (ms)

Time (ms)

pericalcarine

Left

Right

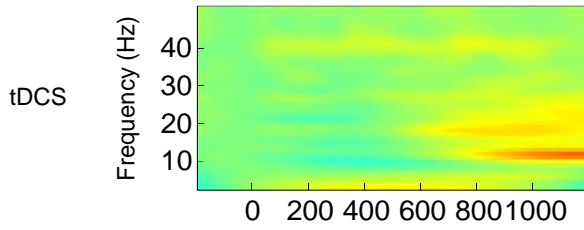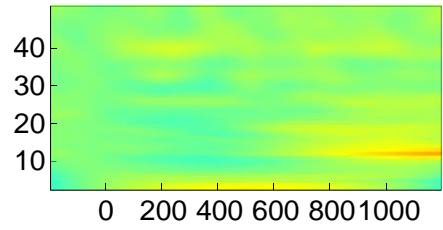

Sham

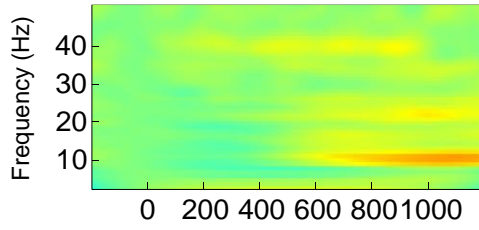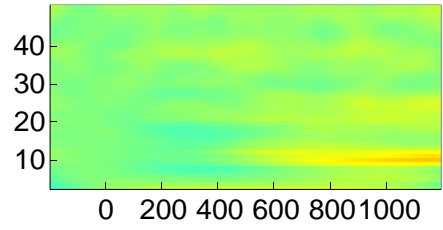

postcentral

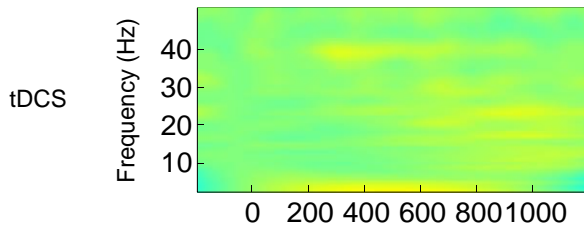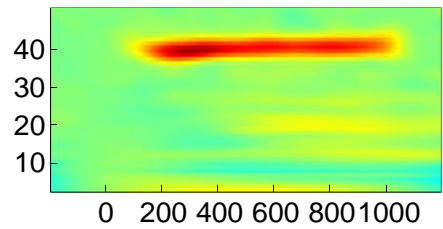

Sham

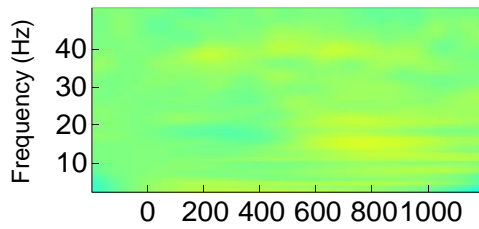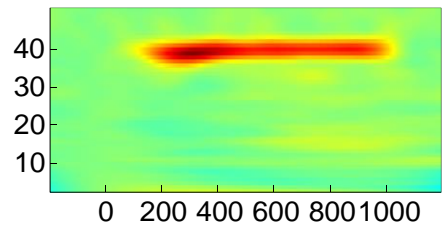

posteriorcingulate

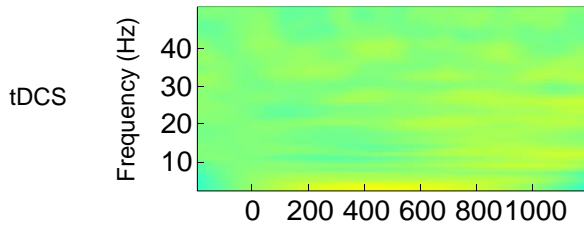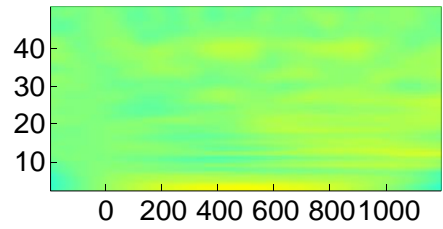

Sham

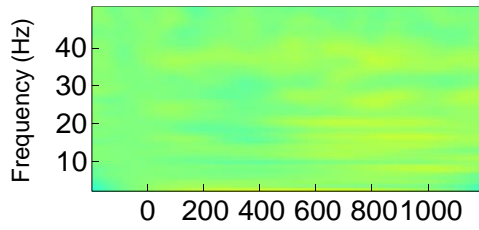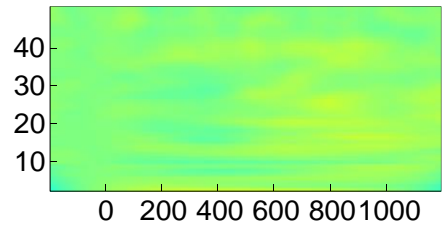

Time (ms)

Time (ms)



precentral

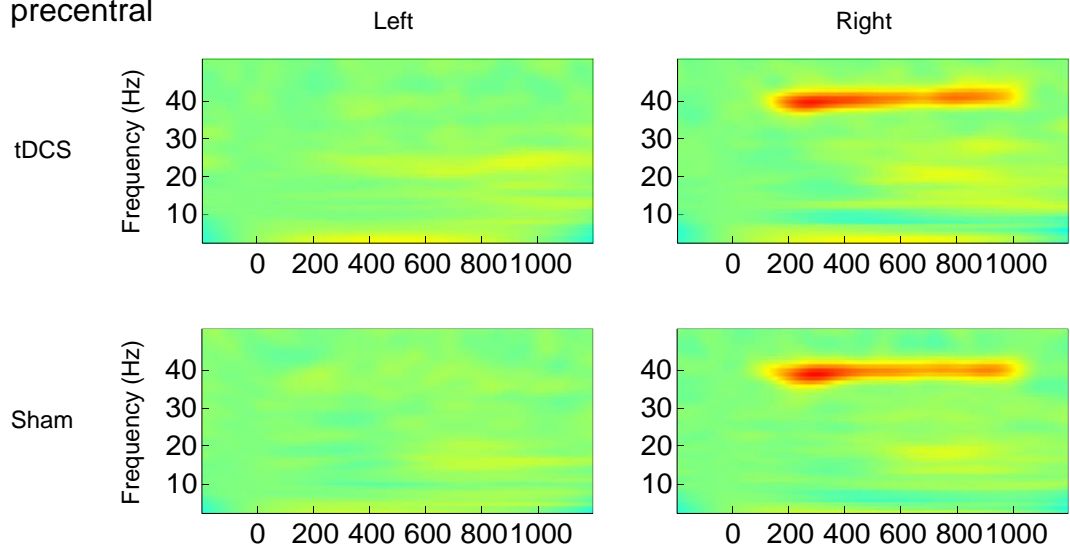

precuneus

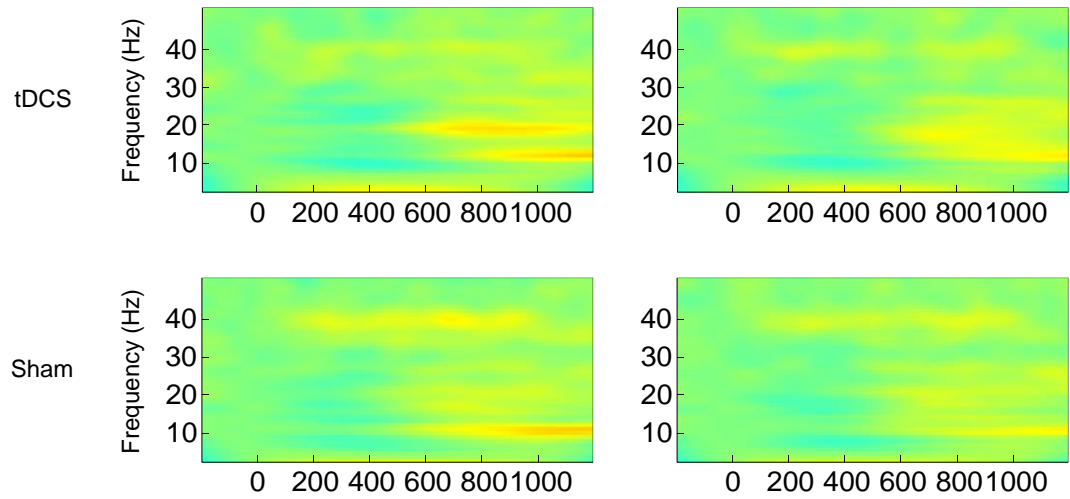

rostralanteriorcingulate

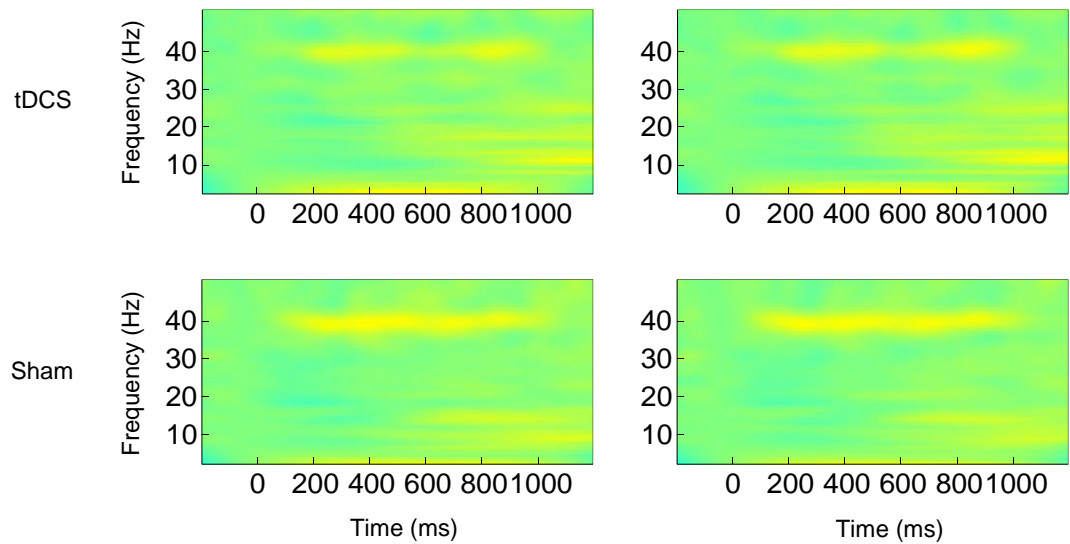



superiortemporal

Left

Right

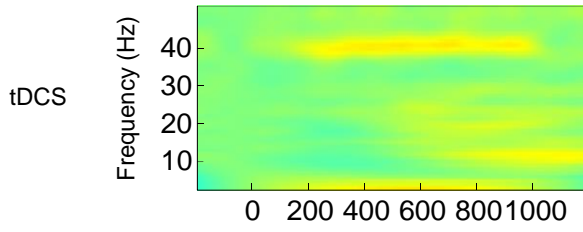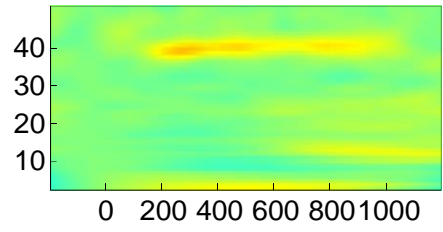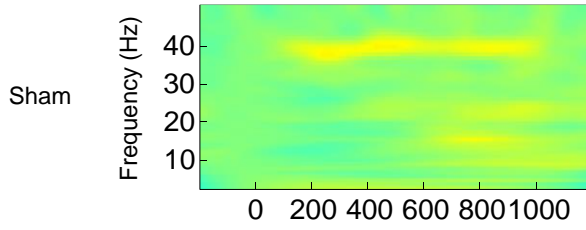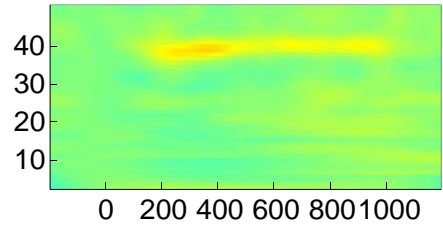

supramarginal

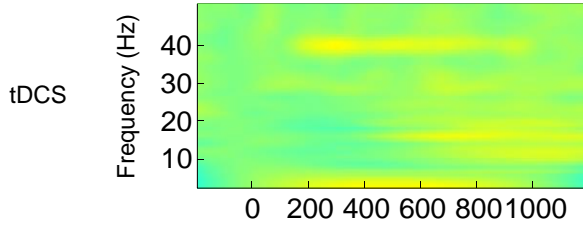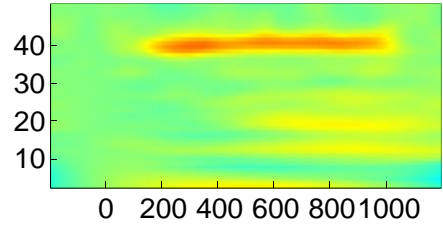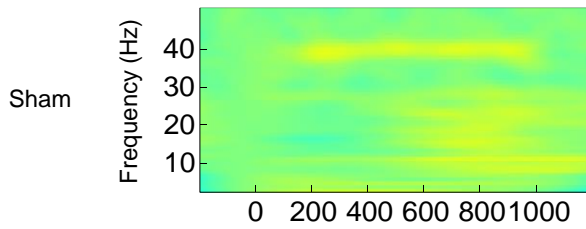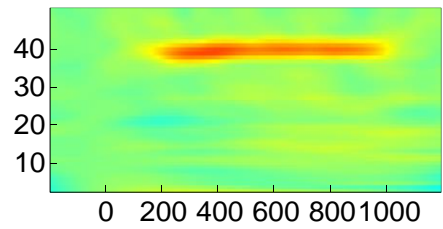

temporalpole

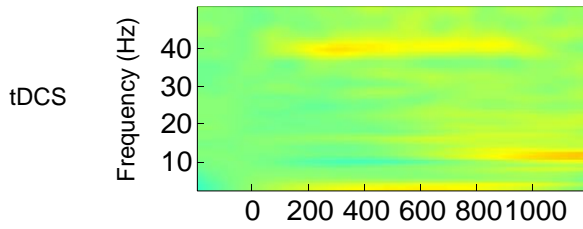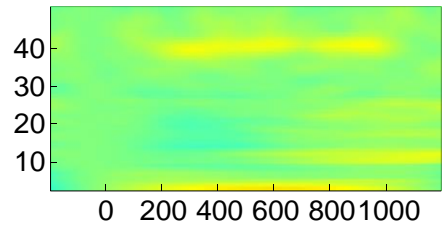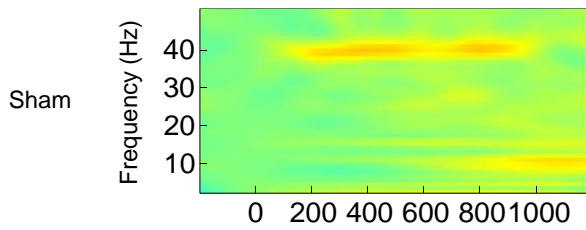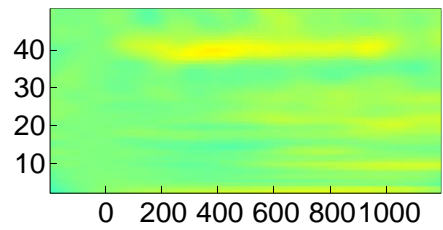

Time (ms)

Time (ms)

transversetemporal

Left

Right

tDCS

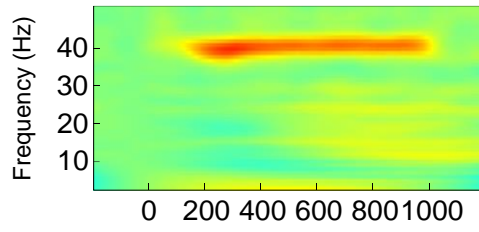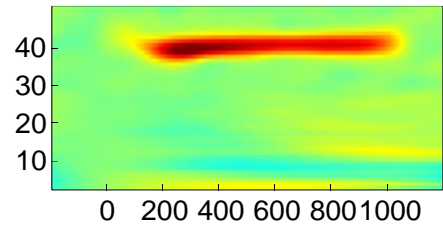

Sham

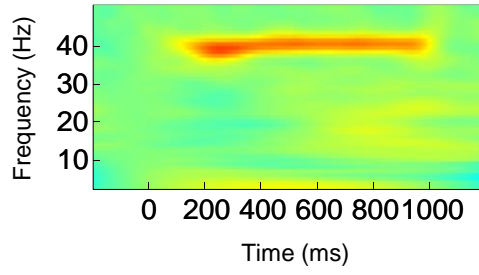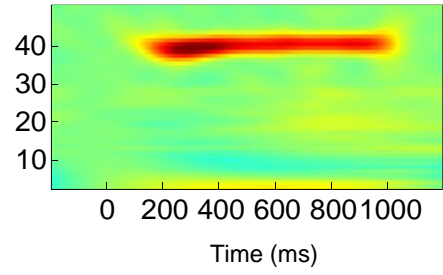

Supplement: pone.0193422.s001.pdf [file pone.0193422.s001.pdf]
