# Supplementary material for: Gamma-band auditory steady-state response after frontal tDCS: A double-blind, randomized, crossover study
Source: PubMed Central journal article supplement (PMC5830999; doi:10.1371/journal.pone.0193422), 2018-02-28

# ITPC

bankssts

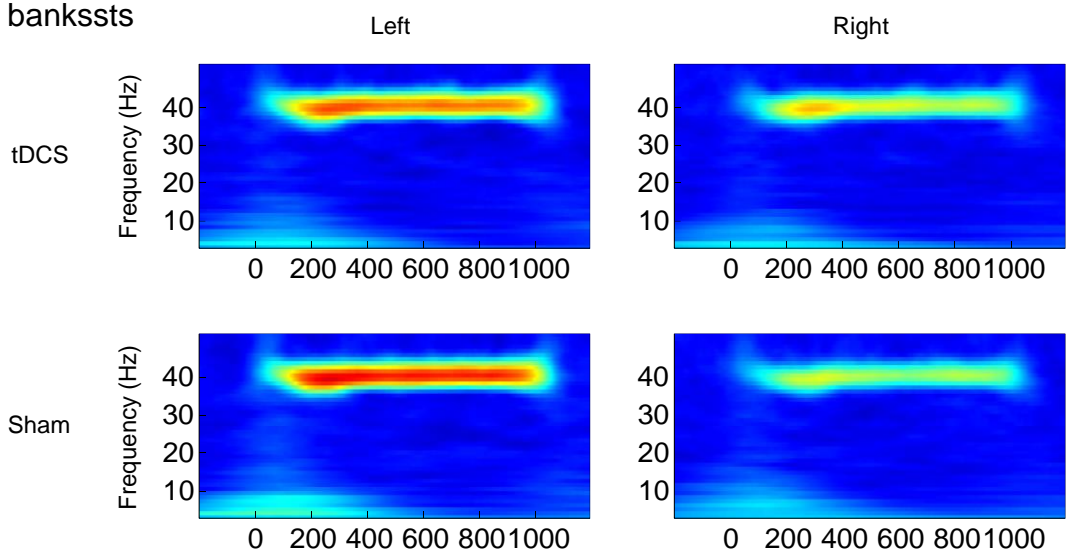

caudalanteriorcingulate

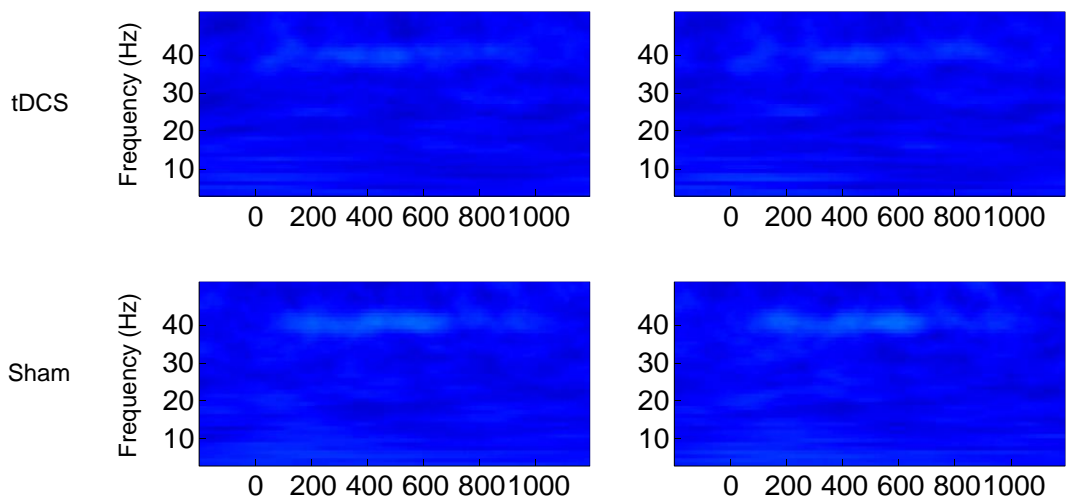

caudalmiddlefrontal

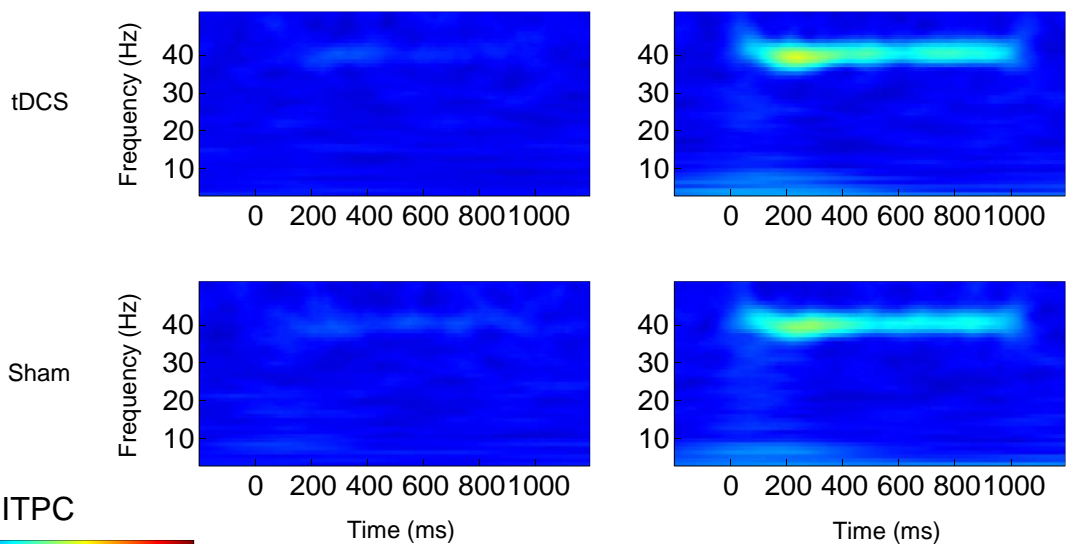

ITPC

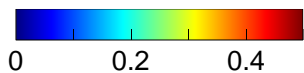

cuneus

Left

Right

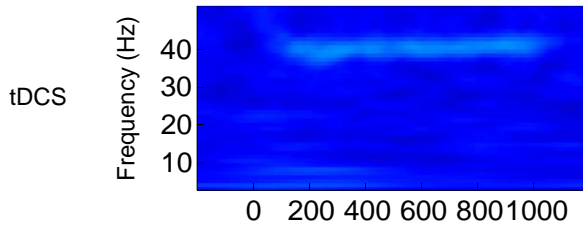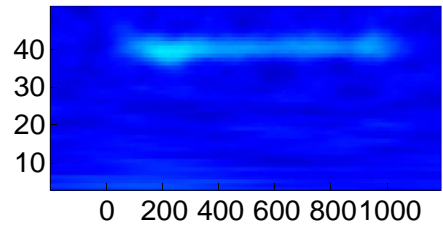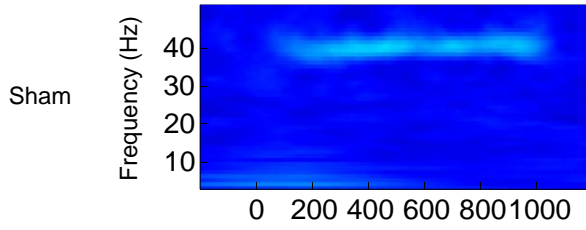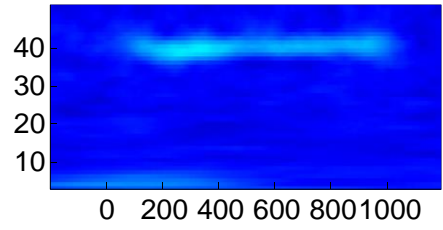

entorhinal

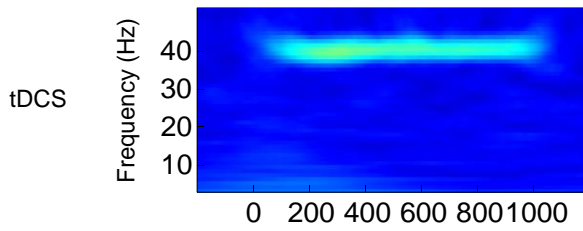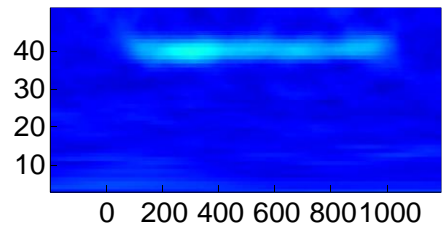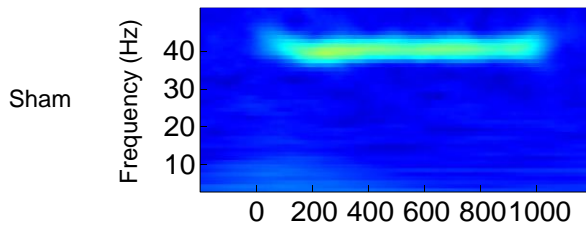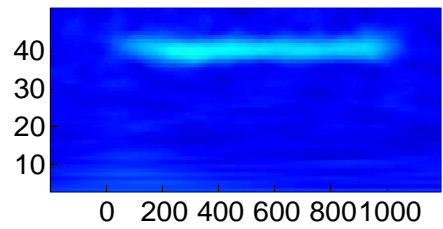

frontalpole

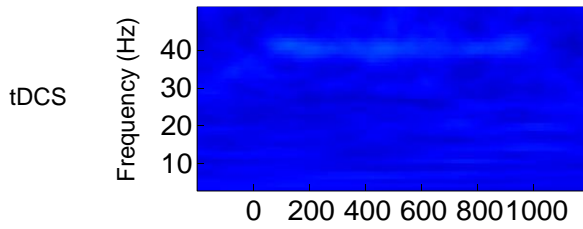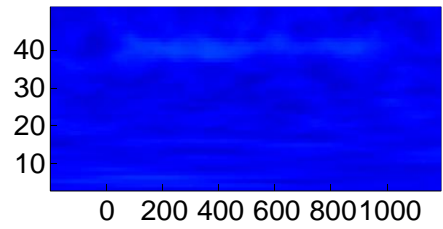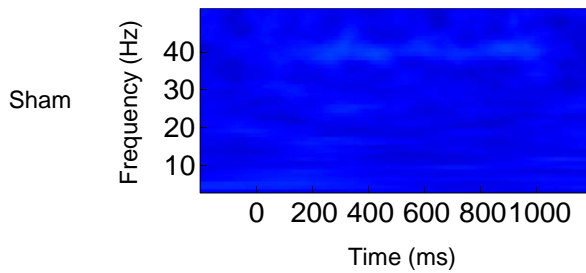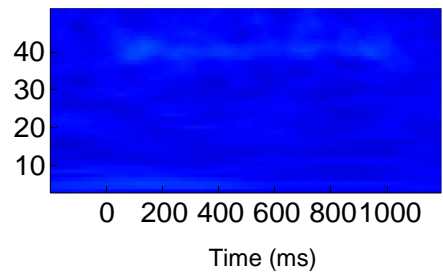

fusiform

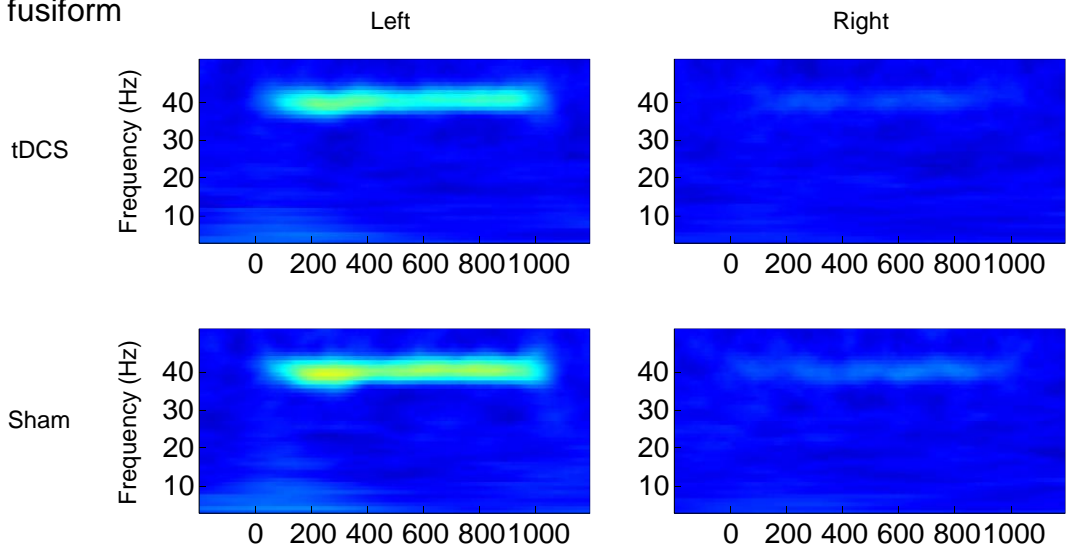

inferiorparietal

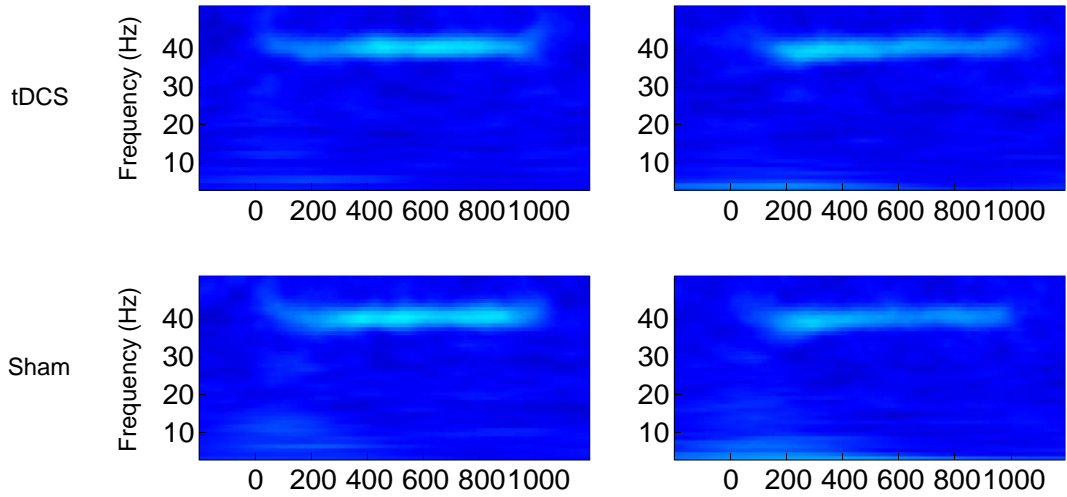

inferiortemporal

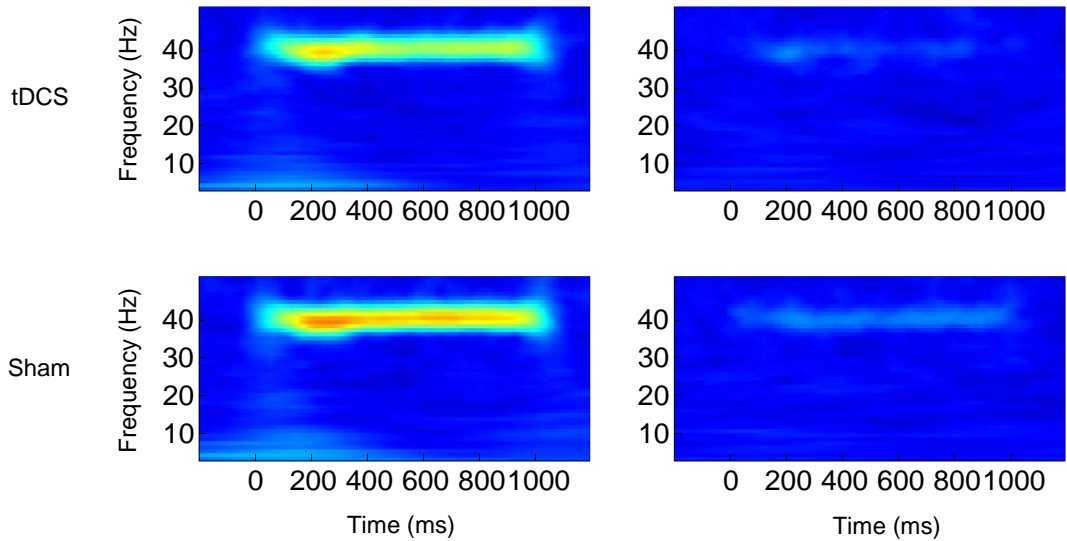

insula

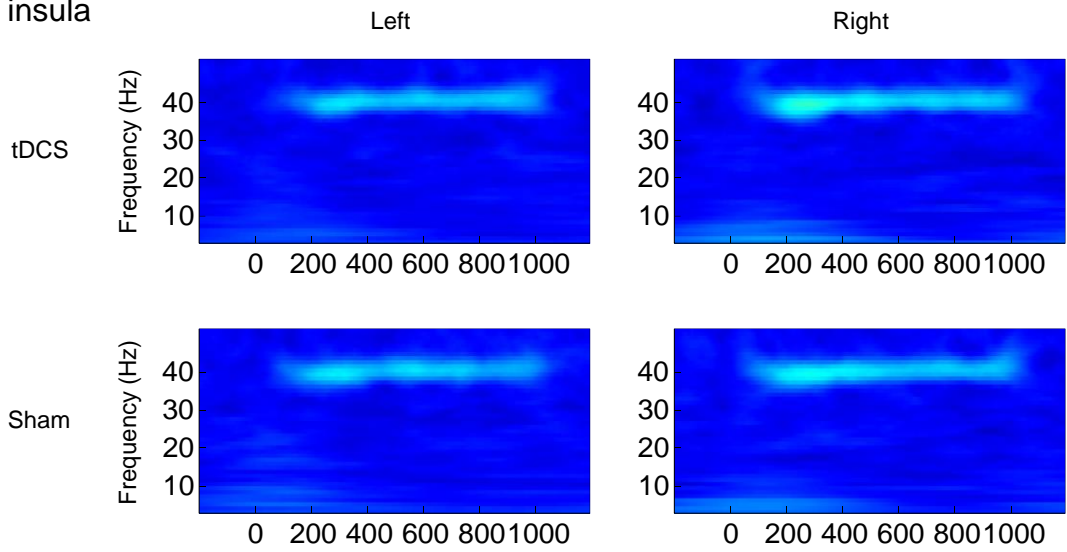

isthmuscingulate

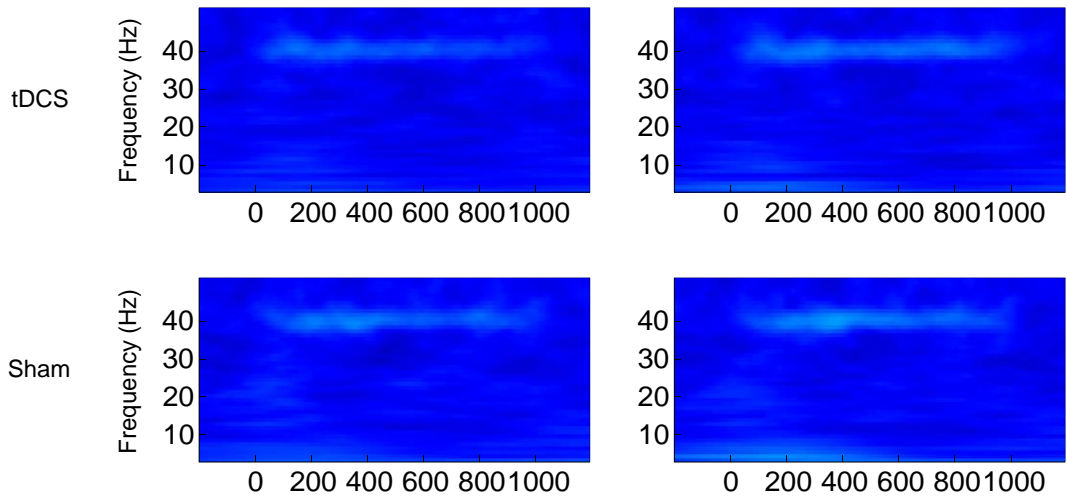

lateraloccipital

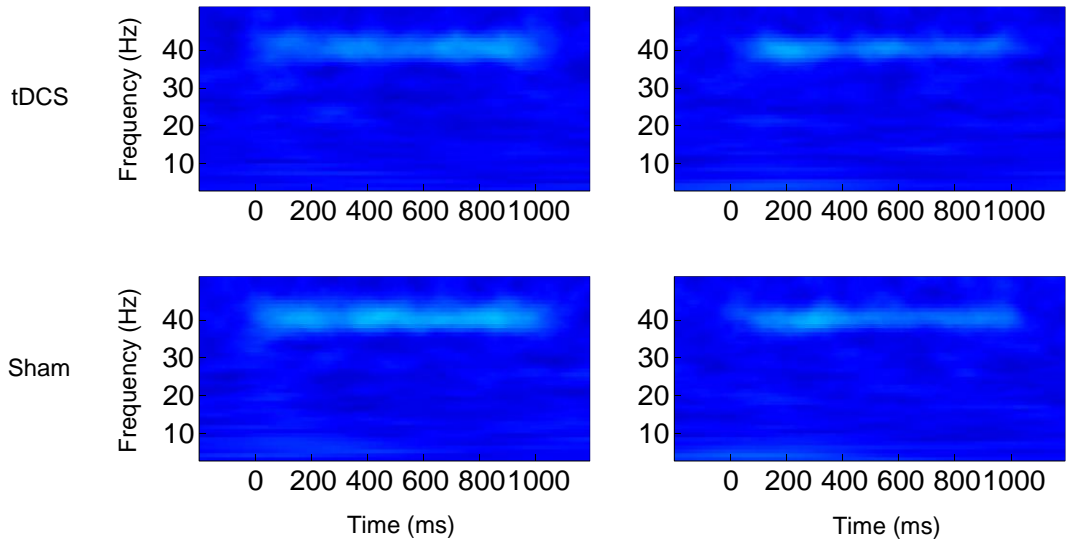





middletemporal

Left

Right

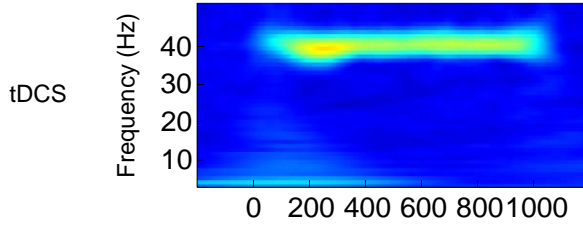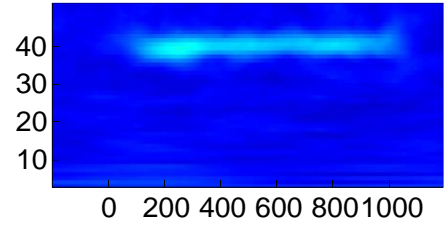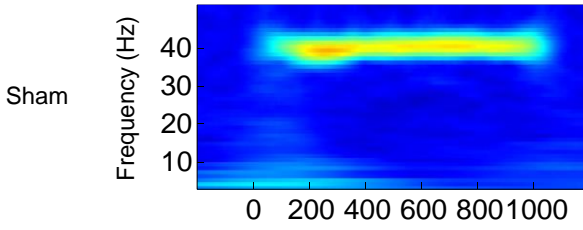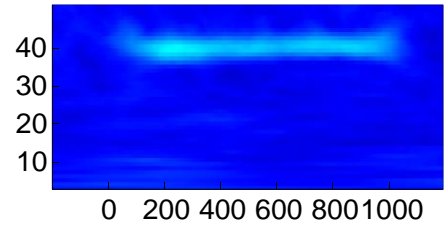

paracentral

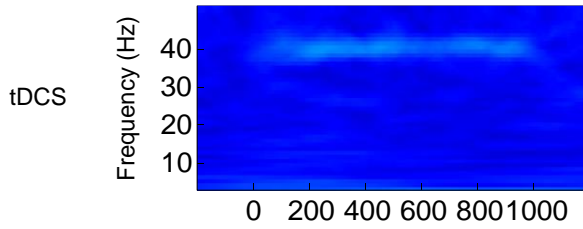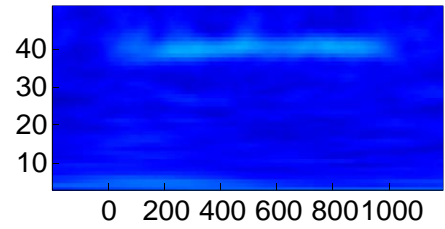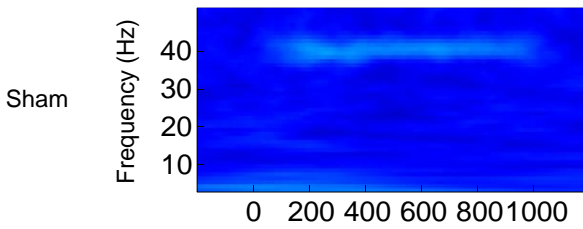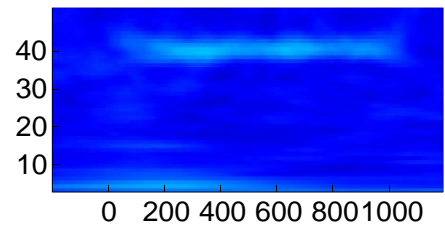

parahippocampal

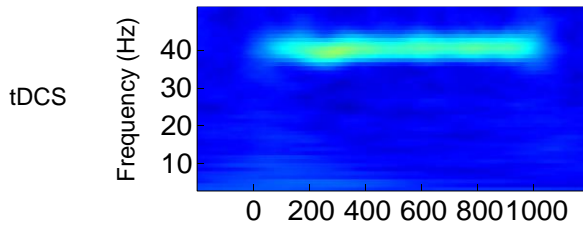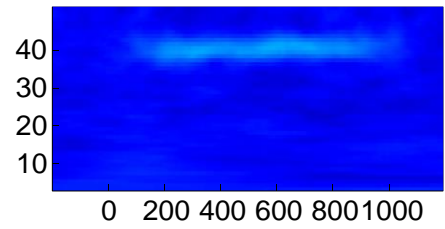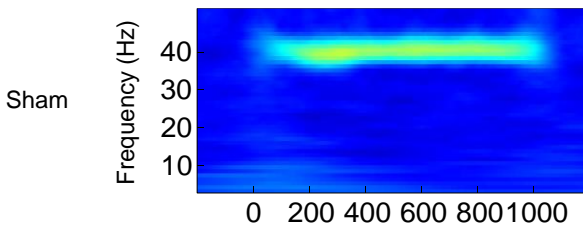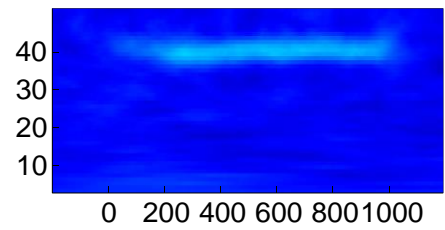

Time (ms)

Time (ms)

parsopercularis

Left

Right

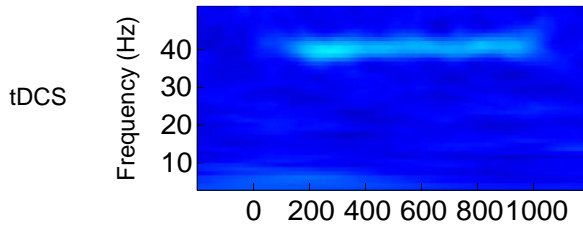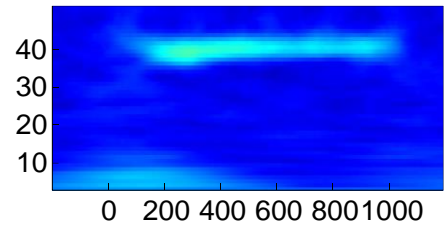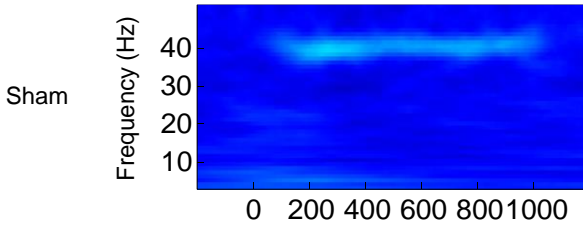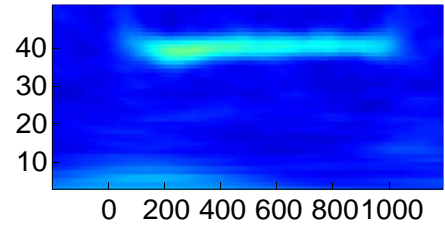

parsorbitalis

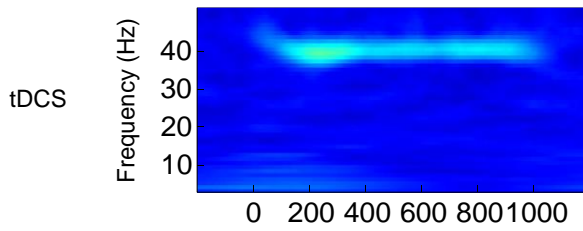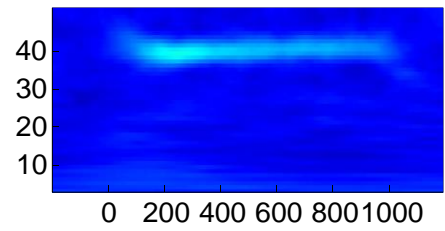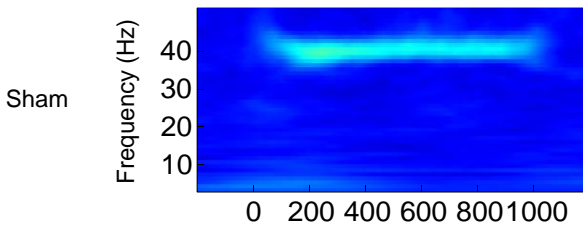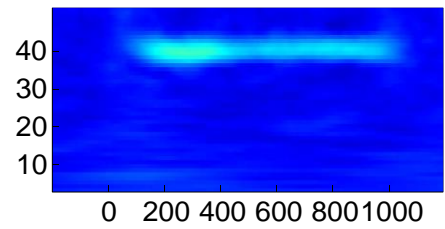

parstriangularis

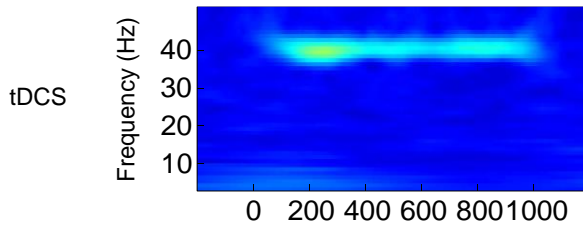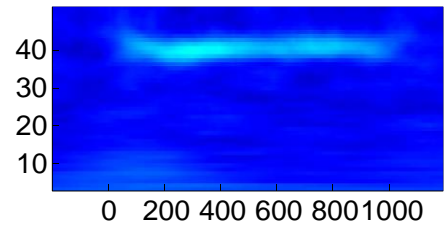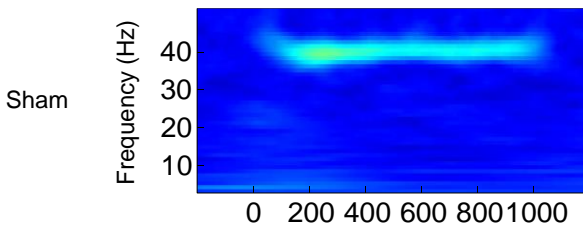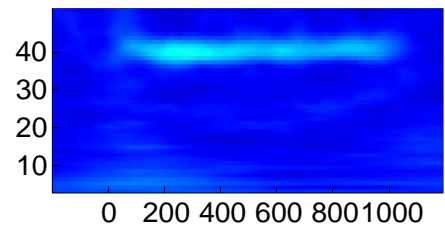

Time (ms)

Time (ms)

pericalcarine

Left

Right

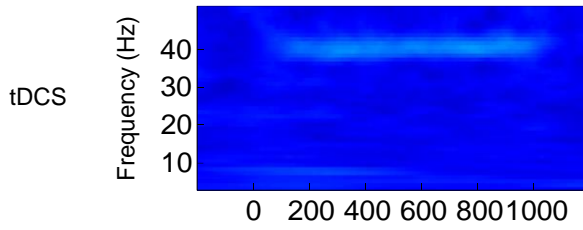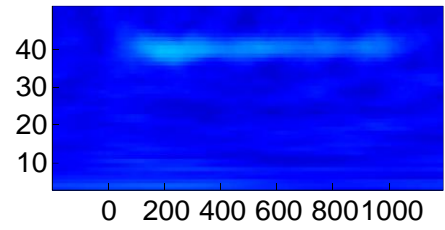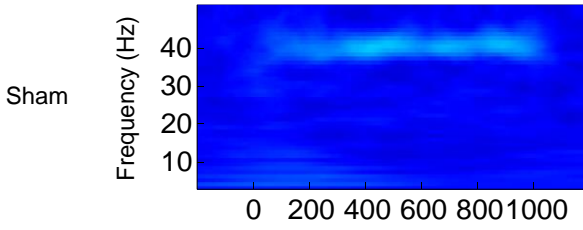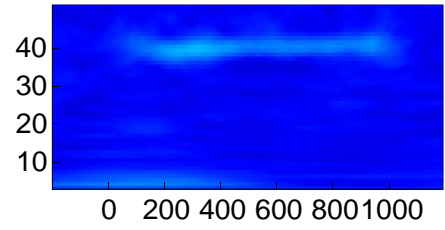

postcentral

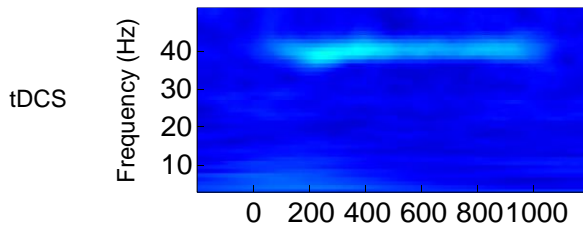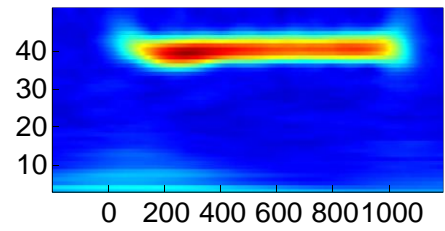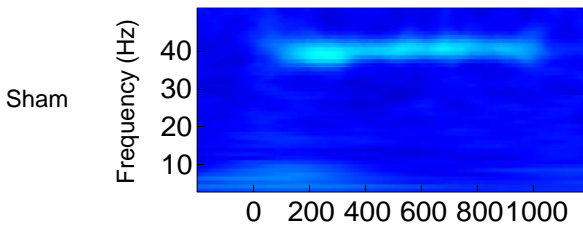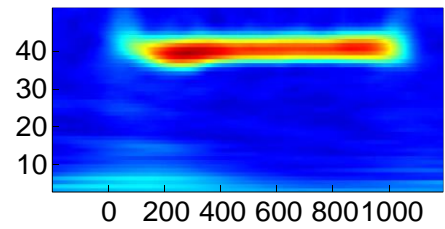

posteriorcingulate

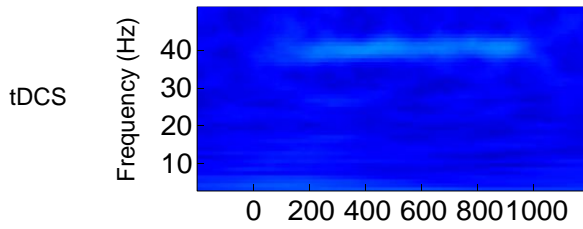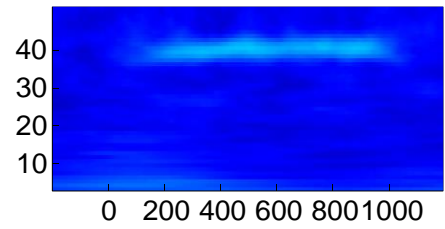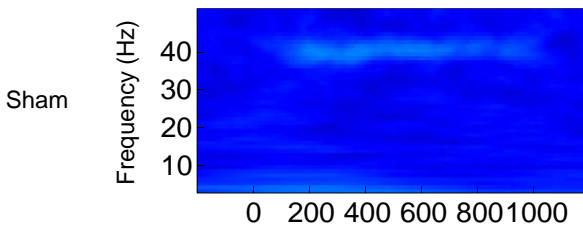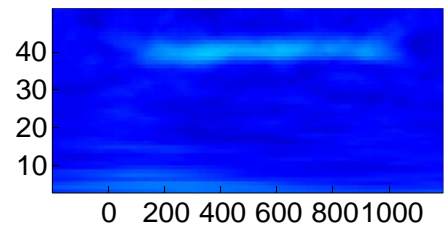

Time (ms)

Time (ms)



precentral

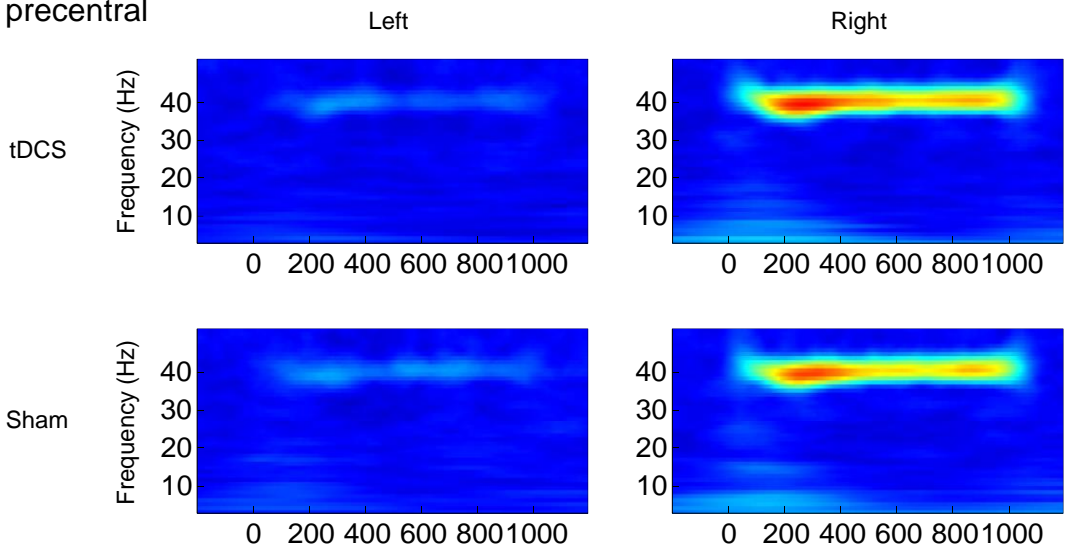

precuneus

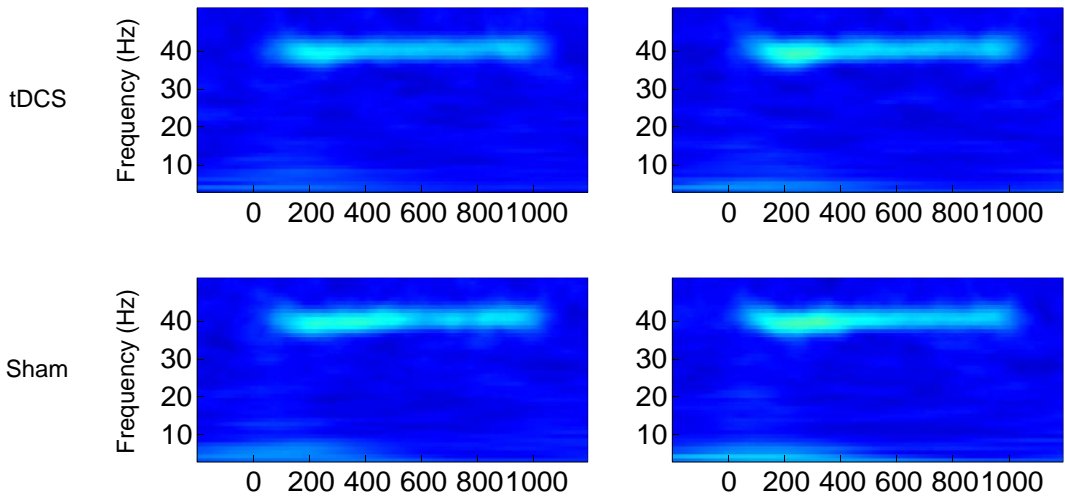

rostralanteriorcingulate

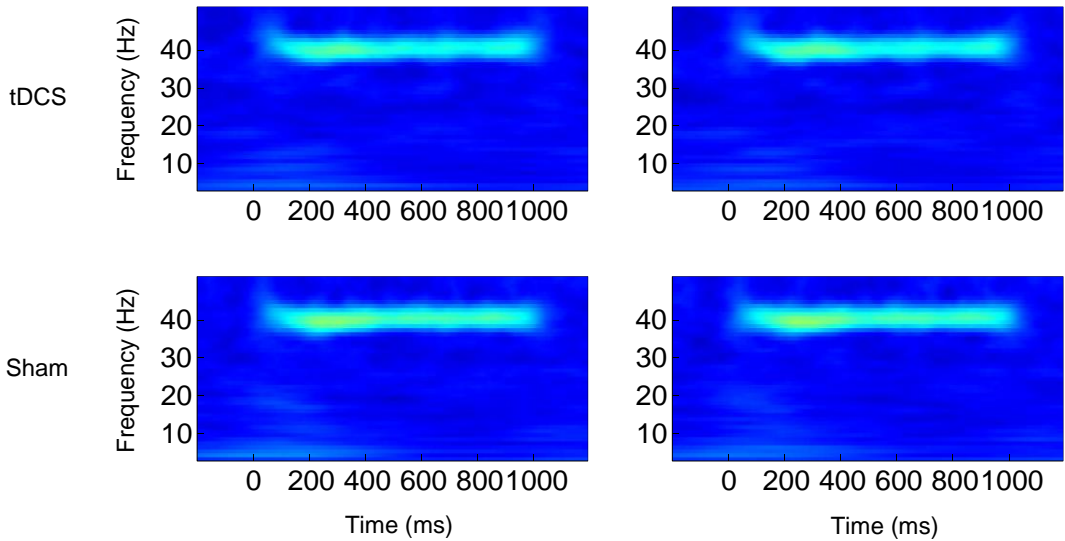

rostralmiddlefrontal

Left

Right

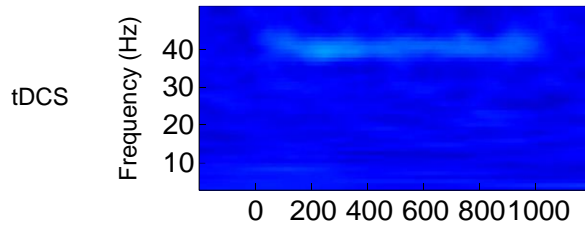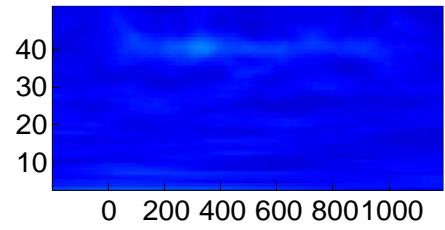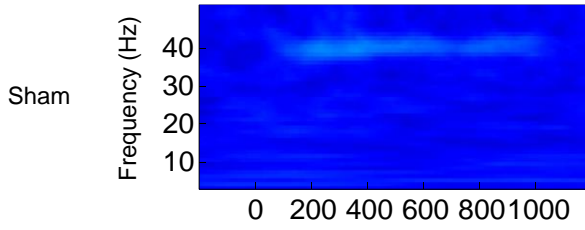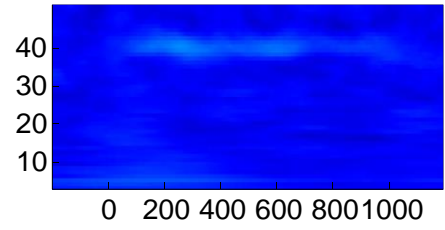

superiorfrontal

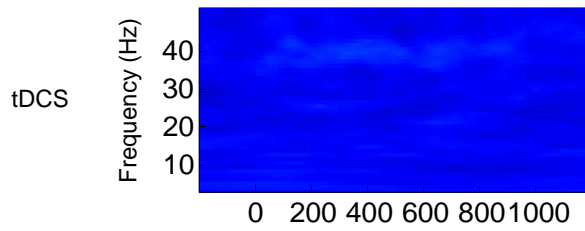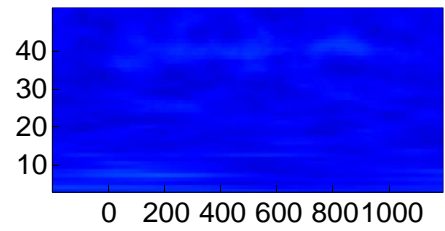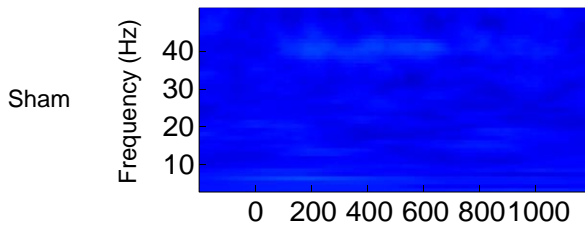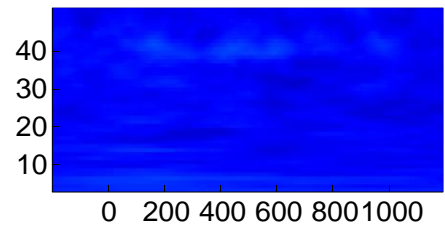

superiorparietal

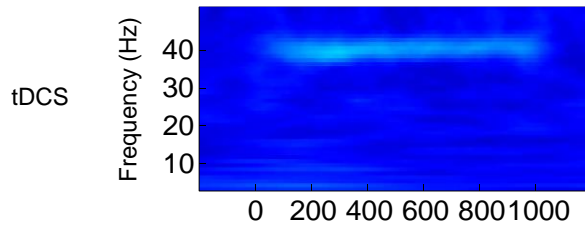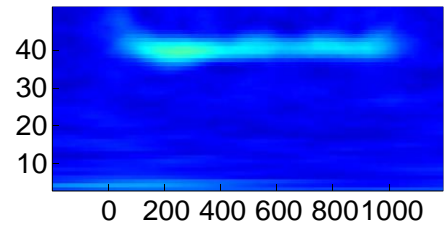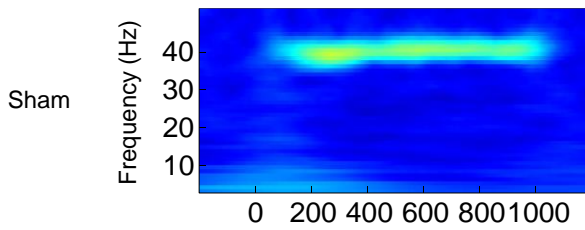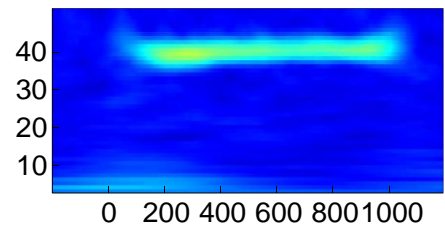

Time (ms)

Time (ms)

superiortemporal

Left

Right

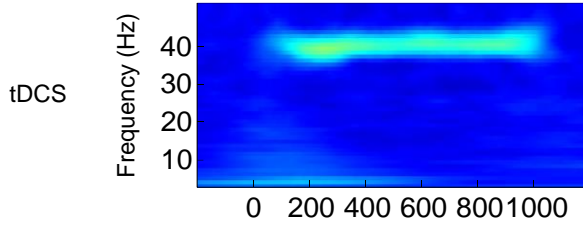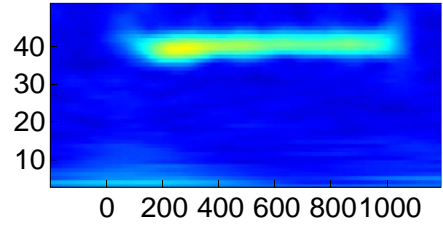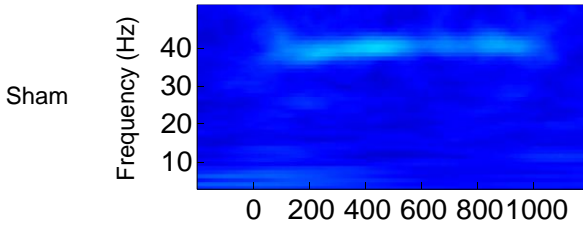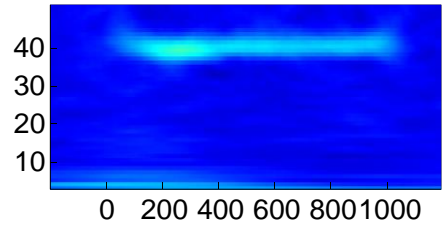

supramarginal

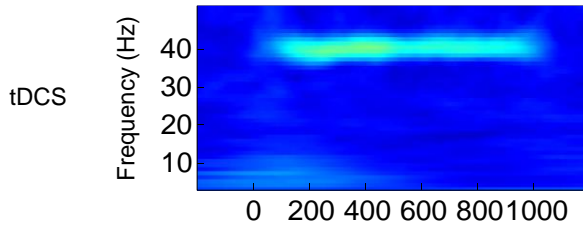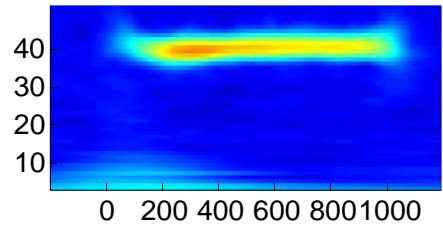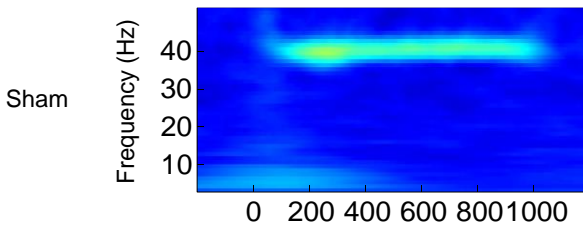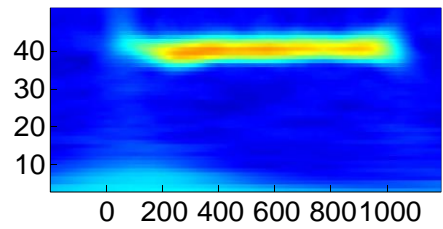

temporalpole

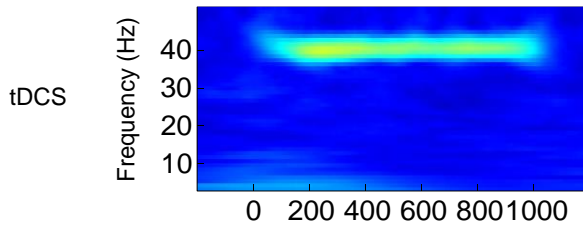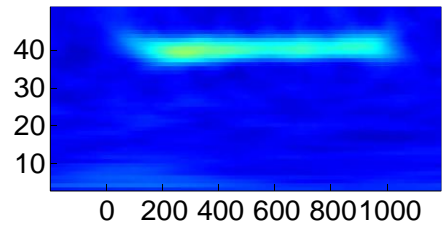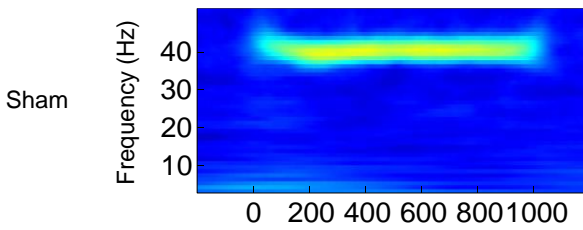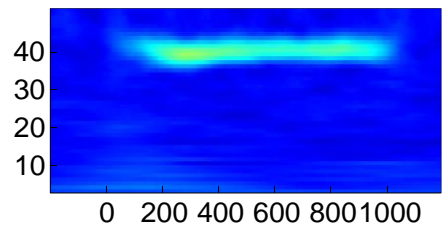

Time (ms)

Time (ms)

transversetemporal

Left

Right

tDCS

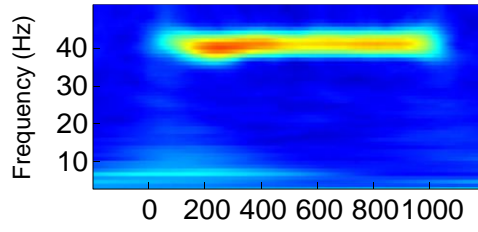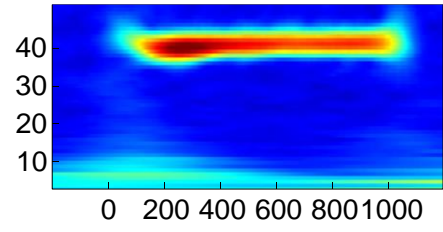

Sham

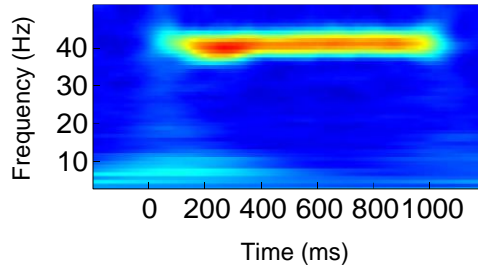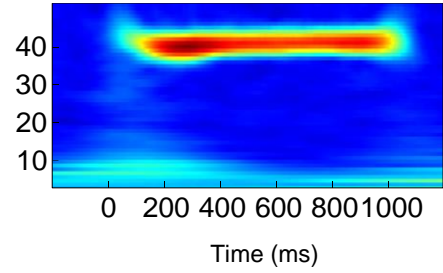

Supplement: pone.0193422.s002.pdf [file pone.0193422.s002.pdf]
